# Supplementary material for: Occurrence of Hydroxytyrosol, Tyrosol and Their Metabolites in Italian Cheese
Source: MDPI journal article supplement (doi:10.3390/molecules28176204), 2023-08-23
Supplement: s1 [file s1]

# Occurrence of Hydroxytyrosol, Tyrosol and Their Metabolites in Italian Cheese

Danilo Giuseppe <sup>1</sup>, Carolina Barola <sup>1</sup>, Elisabetta Bucaletti <sup>1</sup>, Simone Moretti <sup>1</sup>, Fabiola Paoletti <sup>1</sup>, Andrea Valiani <sup>1</sup>, Raffaella Branciarì <sup>2</sup>  
and Roberta Galarini <sup>1,\*</sup>

<sup>1</sup> Istituto Zooprofilattico Sperimentale dell'Umbria e delle Marche "Togo Rosati", Via G. Salvemini 1,  
06126 Perugia, Italy; d.giusepponi@izsum.it (D.G.); c.barola@izsum.it (C.B.); e.bucaletti@izsum.it (E.B.); s.moretti@izsum.it (S.M.); f.paoletti@izsum.it (F.P.);  
a.valiani@izsum.it (A.V.)

<sup>2</sup> Department of Veterinary Medicine, University of Perugia, Via San Costanzo 4, 06126 Perugia, Italy;  
raffaella.branciarì@unipg.it

\* Correspondence: r.galarini@izsum.it; Tel.: +39-075-343272; Fax: +39-075-3433060

**Table S1 – Moisture contents and concentrations of phenylethanoids in commercial cheeses (continued)**

| Sample ID | Cheese type | Moisture (%) | HT-4-S <sup>1</sup><br>( $\mu\text{g kg}^{-1}\text{ dw}$ ) | HT-3-S <sup>1</sup><br>( $\mu\text{g kg}^{-1}\text{ dw}$ ) | T-S <sup>1</sup><br>( $\mu\text{g kg}^{-1}\text{ dw}$ ) | T <sup>1</sup><br>( $\mu\text{g kg}^{-1}\text{ dw}$ ) | HT <sup>1</sup><br>( $\mu\text{g kg}^{-1}\text{ dw}$ ) | Sum<br>( $\mu\text{g kg}^{-1}\text{ dw}$ ) |
|-----------|-------------|--------------|------------------------------------------------------------|------------------------------------------------------------|---------------------------------------------------------|-------------------------------------------------------|--------------------------------------------------------|--------------------------------------------|
| 1         | Ewe cheese  | 23.43        | 128                                                        | 84                                                         | 12                                                      | ND                                                    | ND                                                     | 224                                        |
| 2         |             | 36.55        | 152                                                        | 113                                                        | 8.9                                                     | 108                                                   | ND                                                     | 382                                        |
| 3         |             | 38.75        | 188                                                        | 142                                                        | 8.6                                                     | 116                                                   | ND                                                     | 455                                        |
| 4         |             | 38.92        | 278                                                        | 193                                                        | 16                                                      | ND                                                    | ND                                                     | 487                                        |
| 5         |             | 30.81        | 332                                                        | 117                                                        | ND                                                      | ND                                                    | ND                                                     | 450                                        |
| 6         |             | 36.06        | 345                                                        | 153                                                        | ND                                                      | ND                                                    | ND                                                     | 498                                        |
| 7         |             | 36.75        | 413                                                        | 235                                                        | ND                                                      | ND                                                    | ND                                                     | 648                                        |
| 8         |             | 17.66        | 204                                                        | 92                                                         | ND                                                      | ND                                                    | ND                                                     | 296                                        |
| 9         |             | 38.09        | 278                                                        | 215                                                        | 13                                                      | 65                                                    | ND                                                     | 570                                        |
| 10        |             | 28.11        | 164                                                        | 134                                                        | 9.0                                                     | ND                                                    | 17                                                     | 340                                        |
| 11        |             | 36.87        | 91                                                         | 75                                                         | 11                                                      | 54                                                    | ND                                                     | 231                                        |
| 12        |             | 40.19        | 295                                                        | 138                                                        | ND                                                      | ND                                                    | ND                                                     | 433                                        |
| 13        |             | 29.94        | 192                                                        | 222                                                        | 24                                                      | 57                                                    | ND                                                     | 496                                        |
| 14        |             | 32.07        | 213                                                        | 168                                                        | 7.1                                                     | ND                                                    | ND                                                     | 388                                        |
| 15        |             | 31.47        | 816                                                        | 263                                                        | ND                                                      | 51                                                    | ND                                                     | 1130                                       |
| 16        |             | 27.73        | 242                                                        | 184                                                        | 33                                                      | 228                                                   | 12                                                     | 710                                        |
| 17        |             | 37.98        | 208                                                        | 165                                                        | 11                                                      | 273                                                   | 8.8                                                    | 674                                        |
| 18        |             | 37.04        | 176                                                        | 130                                                        | 15                                                      | 91                                                    | ND                                                     | 412                                        |
| 19        |             | 33.33        | 585                                                        | 176                                                        | ND                                                      | ND                                                    | ND                                                     | 760                                        |

**Table S1 – Moisture contents and concentrations of phenylethanoids in commercial cheeses**

| Sample ID | Cheese type | Moisture (%) | HT-4-S <sup>1</sup><br>(µg kg <sup>-1</sup> dw) | HT-3-S <sup>1</sup><br>(µg kg <sup>-1</sup> dw) | T-S <sup>1</sup><br>(µg kg <sup>-1</sup> dw) | T <sup>1</sup><br>(µg kg <sup>-1</sup> dw) | HT <sup>1</sup><br>(µg kg <sup>-1</sup> dw) | Sum<br>(µg kg <sup>-1</sup> dw) |
|-----------|-------------|--------------|-------------------------------------------------|-------------------------------------------------|----------------------------------------------|--------------------------------------------|---------------------------------------------|---------------------------------|
| 1         | Goat cheese | 63.66        | 19                                              | 12                                              | 7.8                                          | ND                                         | ND                                          | 40                              |
| 2         |             | 65.50        | 29                                              | 10                                              | 14                                           | 2296                                       | ND                                          | 2349                            |
| 3         |             | 50.82        | 52                                              | 23                                              | 12                                           | 1370                                       | ND                                          | 1456                            |
| 4         |             | 38.05        | 12                                              | ND                                              | 9.5                                          | 74                                         | ND                                          | 95                              |
| 1         | Cow cheese  | 40.55        | 22                                              | 9                                               | 15                                           | 362                                        | ND                                          | 409                             |
| 2         |             | 39.77        | 9.1                                             | ND                                              | 6.2                                          | 130                                        | ND                                          | 145                             |
| 3         |             | 41.04        | 12                                              | ND                                              | 12                                           | 292                                        | ND                                          | 317                             |
| 4         |             | 40.67        | 27                                              | 11                                              | 18                                           | 800                                        | ND                                          | 855                             |
| 5         |             | 45.73        | ND                                              | ND                                              | 28                                           | 1593                                       | ND                                          | 1621                            |
| 6         |             | 31.33        | ND                                              | ND                                              | 30                                           | 215                                        | ND                                          | 246                             |
| 7         |             | 36.57        | 5.2                                             | ND                                              | 29                                           | ND                                         | ND                                          | 34                              |
| 8         |             | 23.49        | ND                                              | ND                                              | 24                                           | ND                                         | ND                                          | 24                              |
| 9         |             | 33.83        | 5.3                                             | ND                                              | 9.9                                          | ND                                         | ND                                          | 15                              |
| 10        |             | 30.83        | ND                                              | ND                                              | 6.5                                          | ND                                         | ND                                          | 6.5                             |
| 11        |             | 28.92        | ND                                              | ND                                              | ND                                           | ND                                         | ND                                          | -                               |
| 12        |             | 28.17        | ND                                              | ND                                              | ND                                           | 60                                         | ND                                          | 60                              |
| 13        |             | 26.77        | ND                                              | ND                                              | ND                                           | ND                                         | ND                                          | -                               |

<sup>1</sup>ND: Not Detected (< LOD); Results <LOD were placed equal to ½ LOD for statistical elaboration

**Table S2 – Chromatographic conditions**

| Time (min) | A (%) aqueous phase<br>(2 mM ammonium acetate) | B (%) Methanol | Curve |
|------------|------------------------------------------------|----------------|-------|
| 0          | 100                                            | 0              | 5     |
| 2          | 100                                            | 0              | 5     |
| 6          | 90                                             | 10             | 5     |
| 13         | 30                                             | 70             | 5     |
| 15         | 30                                             | 70             | 5     |
| 15.5       | 0                                              | 100            | 5     |
| 18         | 0                                              | 100            | 5     |
| 18.5       | 100                                            | 0              | 5     |
| 22         | 100                                            | 0              | 5     |

**Table S3 - Formulas, structures and monitored ions of analytes**

| Analyte                                      | Structure | Formula                                         | RT<br>(min) | Theoretical<br>( <i>m/z</i> ) | [M-H] <sup>-</sup><br>( <i>m/z</i> ) | Fragment 1<br>( <i>m/z</i> ) | Fragment 2<br>( <i>m/z</i> ) |
|----------------------------------------------|-----------|-------------------------------------------------|-------------|-------------------------------|--------------------------------------|------------------------------|------------------------------|
| Tyrosol<br>Glucuronide<br>(T-G)              |           | C <sub>14</sub> H <sub>18</sub> O <sub>8</sub>  | 6.1         | 314.1001                      | 313.0929                             | 175.0239                     | 137.0594                     |
| Hydroxytyrosol-3-<br>Glucuronide<br>(HT-3-G) |           | C <sub>14</sub> H <sub>18</sub> O <sub>9</sub>  | 6.8         | 330.0951                      | 329.0878                             | 175.0237                     | 153.0542                     |
| Hydroxytyrosol Sulphate<br>(HT-S)            |           | C <sub>8</sub> H <sub>10</sub> O <sub>6</sub> S | 6.8         | 234.0198                      | 233.0125                             | 153.0544                     | 123.0436                     |
| HT-4-S                                       |           | C <sub>8</sub> H <sub>10</sub> O <sub>6</sub> S | 7.6         | 234.0198                      | 233.0125                             | 153.0544                     | 123.0436                     |

|                        |                                                                                     |          |     |          |          |          |          |
|------------------------|-------------------------------------------------------------------------------------|----------|-----|----------|----------|----------|----------|
| HT-3-S                 | 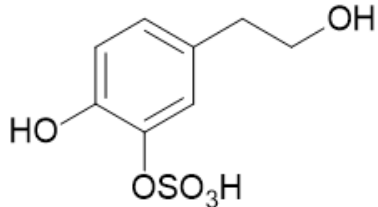   | C8H10O6S | 7.8 | 234.0198 | 233.0125 | 153.0544 | 123.0436 |
| Tyrosol sulphate (T-S) |    | C8H10O5S | 8.2 | 218.0249 | 217.0176 | 137.0596 | 119.0489 |
| Hydroxy Tyrosol (HT)   |    | C8H10O3  | 8.9 | 154.0629 | 153.0557 | 123.0436 | 108.0200 |
| HT-d4                  |  | C8H6D4O3 | 8.9 | 158.0881 | 157.0808 | -        | -        |

|             |                                                                                   |                                               |      |          |          |          |          |
|-------------|-----------------------------------------------------------------------------------|-----------------------------------------------|------|----------|----------|----------|----------|
| Tyrosol (T) | 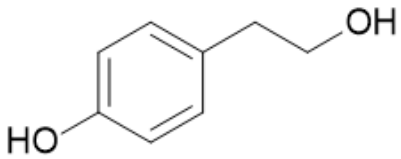 | C <sub>8</sub> H <sub>10</sub> O <sub>2</sub> | 10.2 | 138.0675 | 137.0608 | 119.0488 | 106.0409 |
|-------------|-----------------------------------------------------------------------------------|-----------------------------------------------|------|----------|----------|----------|----------|

**Table S4 –Collected commercial cheese samples**

| Cheese            | Sample ID | Producer                | Moisture (%) | Classification <sup>1</sup> | Cheese             | Sample ID | Producer (Italian region) | Moisture (%) | Classification of cheese <sup>1</sup> |
|-------------------|-----------|-------------------------|--------------|-----------------------------|--------------------|-----------|---------------------------|--------------|---------------------------------------|
| <b>Ewe cheese</b> | 1         | Farm A (Umbria)         | 23.43        | Very hard                   |                    |           |                           |              |                                       |
|                   | 2         | Farm A (Umbria)         | 36.55        | Semihard                    | <b>Goat cheese</b> | 1         | Farm I (Venetian)         | 63.66        | Fresh /curd                           |
|                   | 3         | Farm A (Umbria)         | 38.75        | Semihard                    |                    | 2         | Farm J (Umbria)           | 65.50        | Fresh/curd                            |
|                   | 4         | Farm A (Umbria)         | 38.92        | Semihard                    |                    | 3         | Farm J (Umbria)           | 50.82        | Soft                                  |
|                   | 5         | Farm A (Umbria)         | 30.81        | Hard                        |                    | 4         | Farm J (Umbria)           | 38.05        | Semihard                              |
|                   | 6         | Farm A (Umbria)         | 36.06        | Semihard                    |                    |           |                           |              |                                       |
|                   | 7         | Farm A (Umbria)         | 36.75        | Semihard                    | <b>Cow cheese</b>  | 1         | Farm J (Umbria)           | 40.55        | Soft                                  |
|                   | 8         | Farm A (Umbria)         | 17.66        | Very hard                   |                    | 2         | Farm J (Umbria)           | 39.77        | Semihard                              |
|                   | 9         | Farm B (Umbria)         | 38.09        | Semihard                    |                    | 3         | Farm K (Umbria)           | 41.04        | Soft                                  |
|                   | 10        | Farm C (Tuscany)        | 28.11        | Hard                        |                    | 4         | Farm A (Umbria)           | 40.67        | Soft                                  |
|                   | 11        | Farm C (Tuscany)        | 36.87        | Semihard                    |                    | 5         | Farm L (Umbria)           | 45.73        | Soft                                  |
|                   | 12        | Farm C (Tuscany)        | 40.19        | Soft                        |                    | 6         | Farm M (Venetian)         | 31.33        | Hard                                  |
|                   | 13        | Farm D (Tuscany)        | 29.94        | Hard                        |                    | 7         | Farm N (Piedmont)         | 36.57        | Semihard                              |
|                   | 14        | Farm E (Tuscany)        | 32.07        | Hard                        |                    | 8         | Farm O (Venetian)         | 23.49        | Very hard                             |
|                   | 15        | Farm E (Tuscany)        | 31.47        | Hard                        |                    | 9         | Farm P (Emilia Romagna)   | 33.83        | Hard                                  |
|                   | 16        | Farm F (Emilia Romagna) | 27.73        | Hard                        |                    | 10        | Farm P (Emilia Romagna)   | 30.83        | Hard                                  |
|                   | 17        | Farm F (Emilia Romagna) | 37.98        | Semihard                    |                    | 11        | Farm P (Emilia Romagna)   | 28.92        | Hard                                  |
|                   | 18        | Farm G (Sardinia)       | 37.04        | Semihard                    |                    | 12        | Farm P (Emilia Romagna)   | 28.17        | Hard                                  |
|                   | 19        | Farm H (Lazio)          | 33.33        | Hard                        |                    | 13        | Farm P (Emilia Romagna)   | 26.77        | Hard                                  |

<sup>1</sup>Cheese classification is based on rheological properties [46]



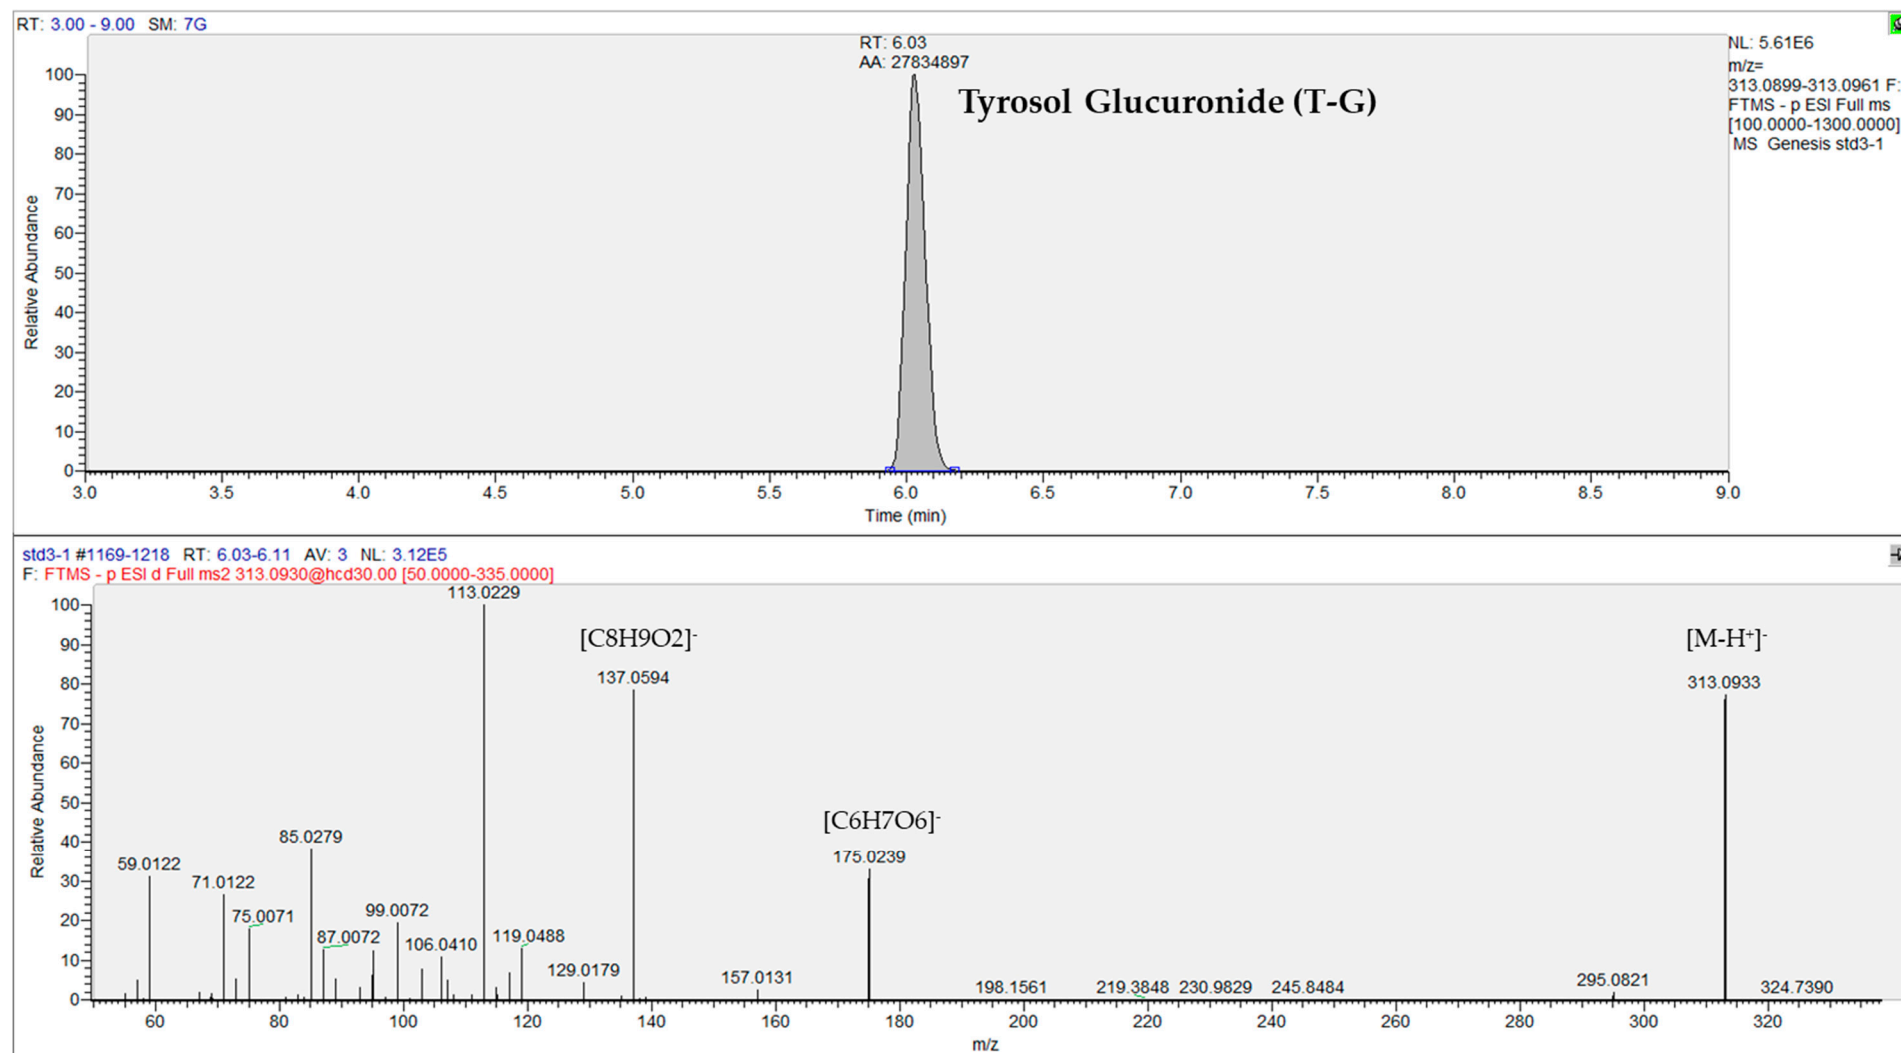

Figure S1 – LC-Q-Orbitrap chromatogram and MS<sup>2</sup> spectrum of T-G

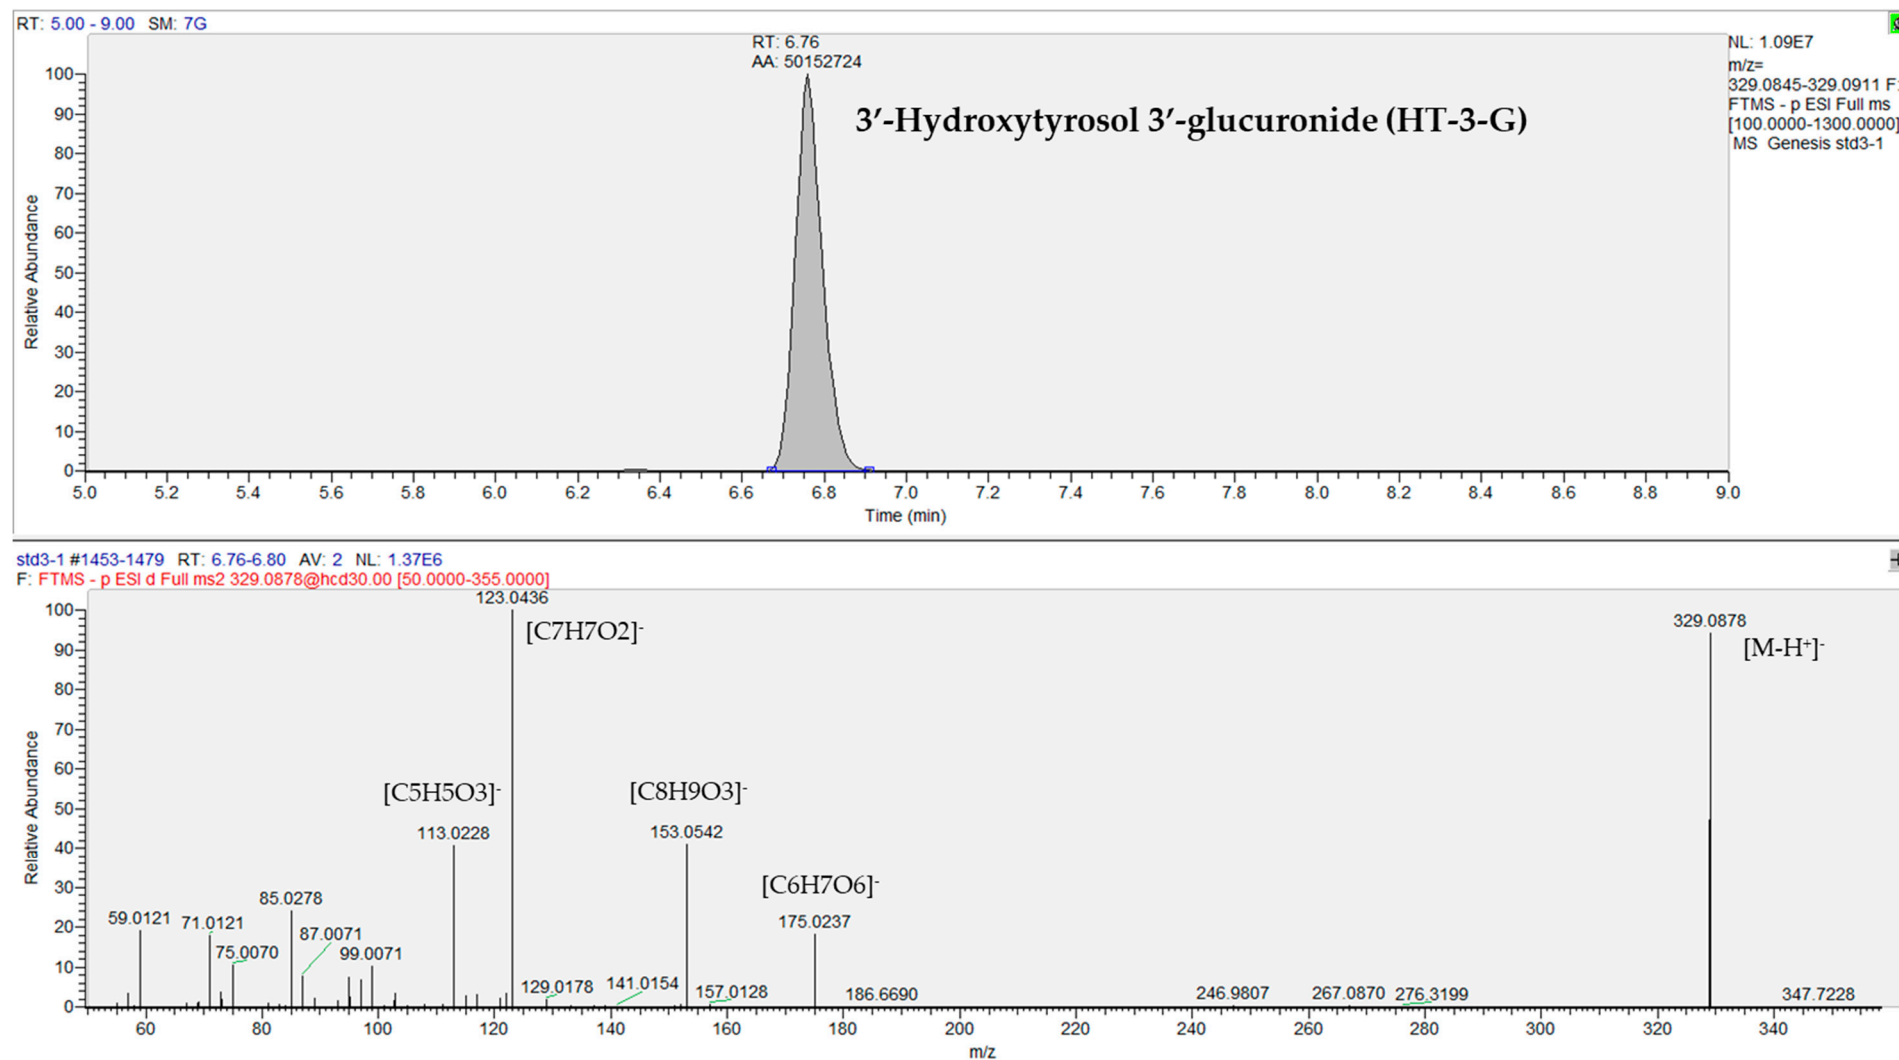

Figure S2 – LC-Q-Orbitrap chromatogram and MS<sup>2</sup> spectrum of HT-3-G

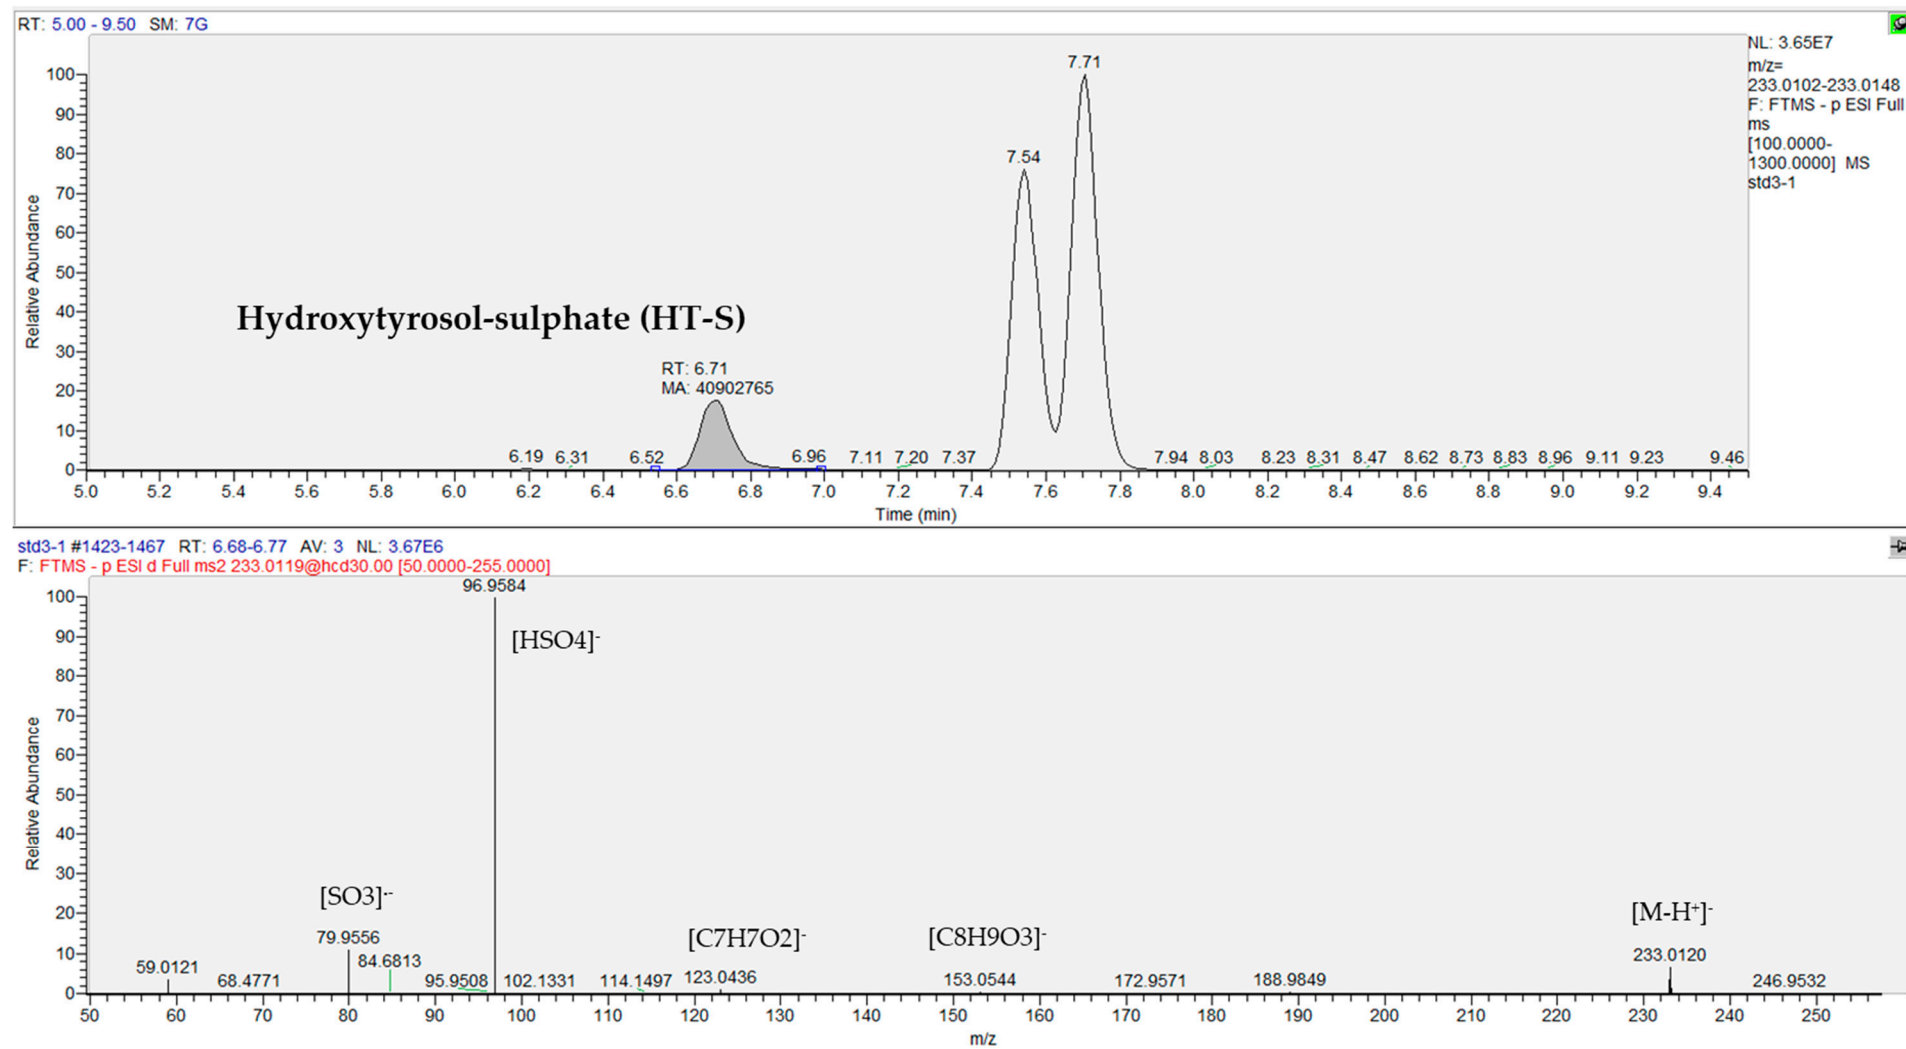

Figure S3 – LC-Q-Orbitrap chromatogram and MS<sup>2</sup> spectrum of HT-S

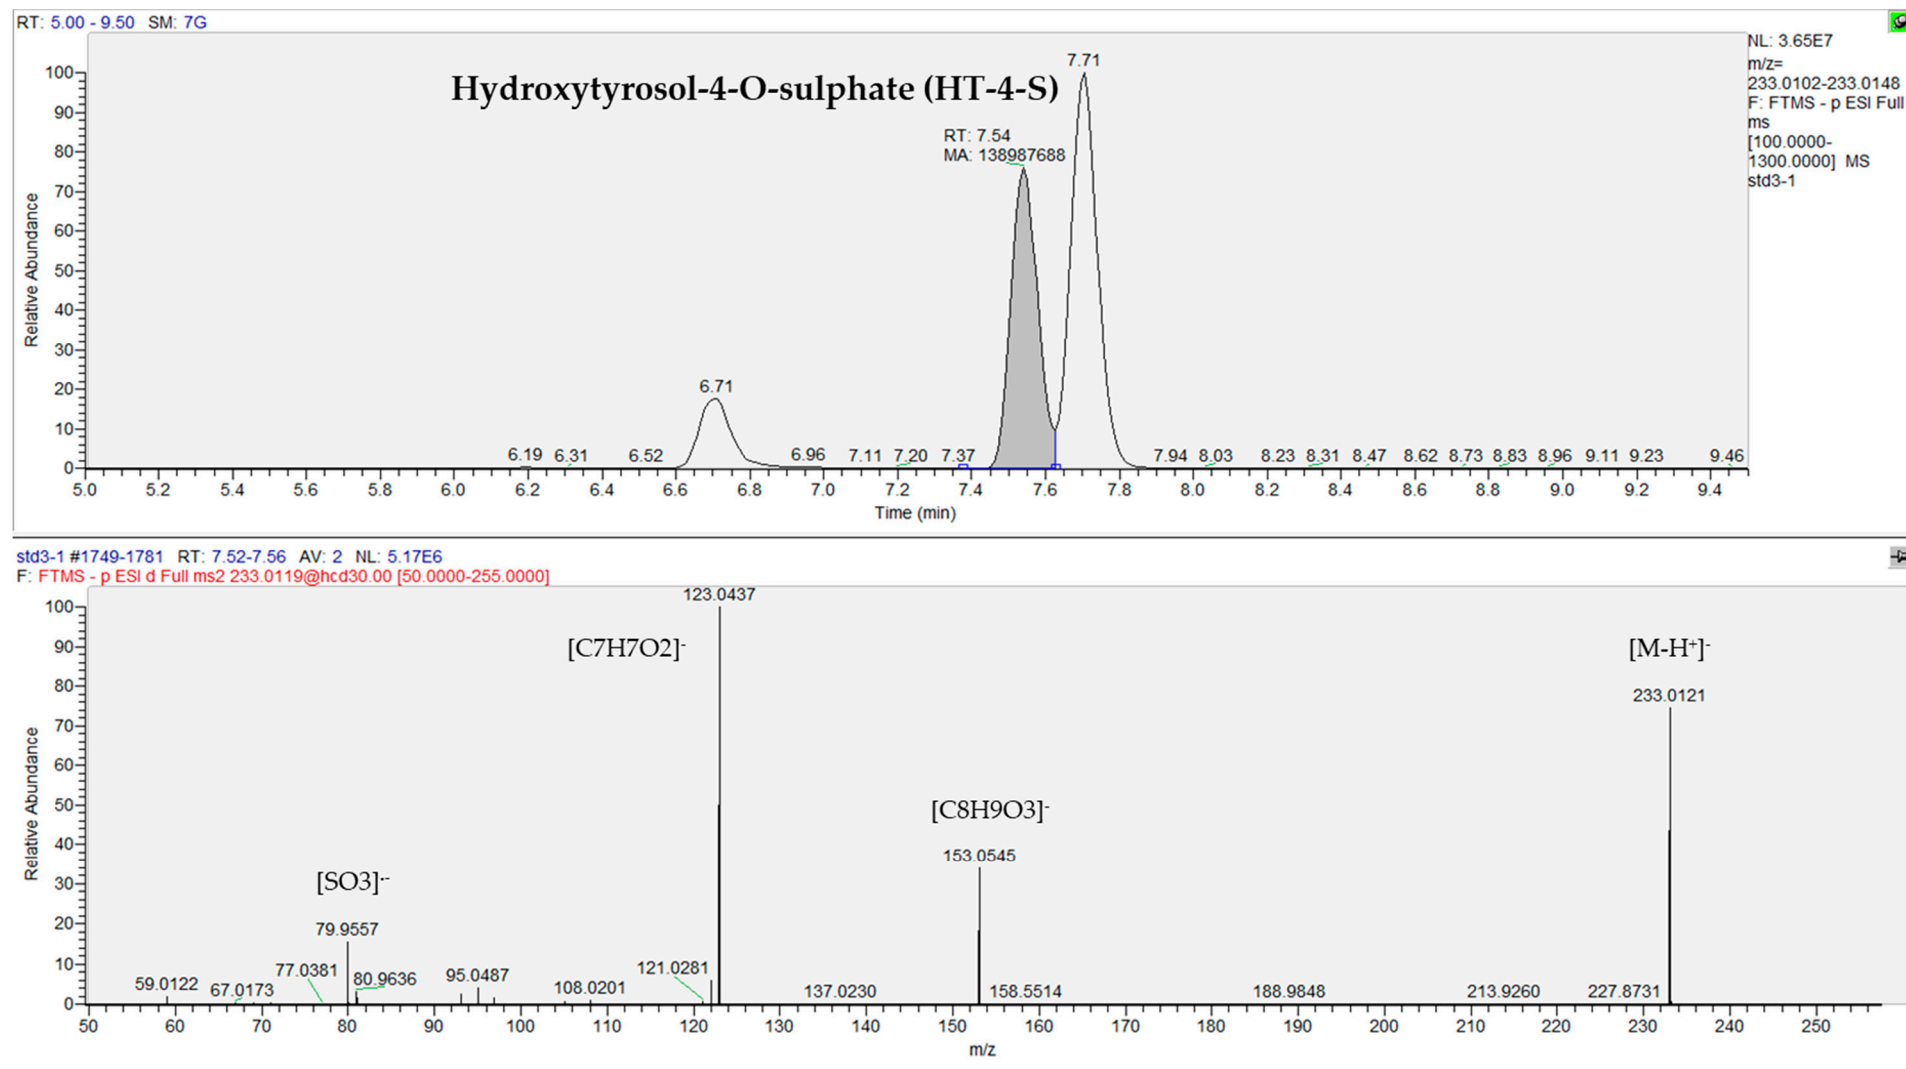

Figure S4 – LC-Q-Orbitrap chromatogram and MS<sup>2</sup> spectrum of HT-4-S

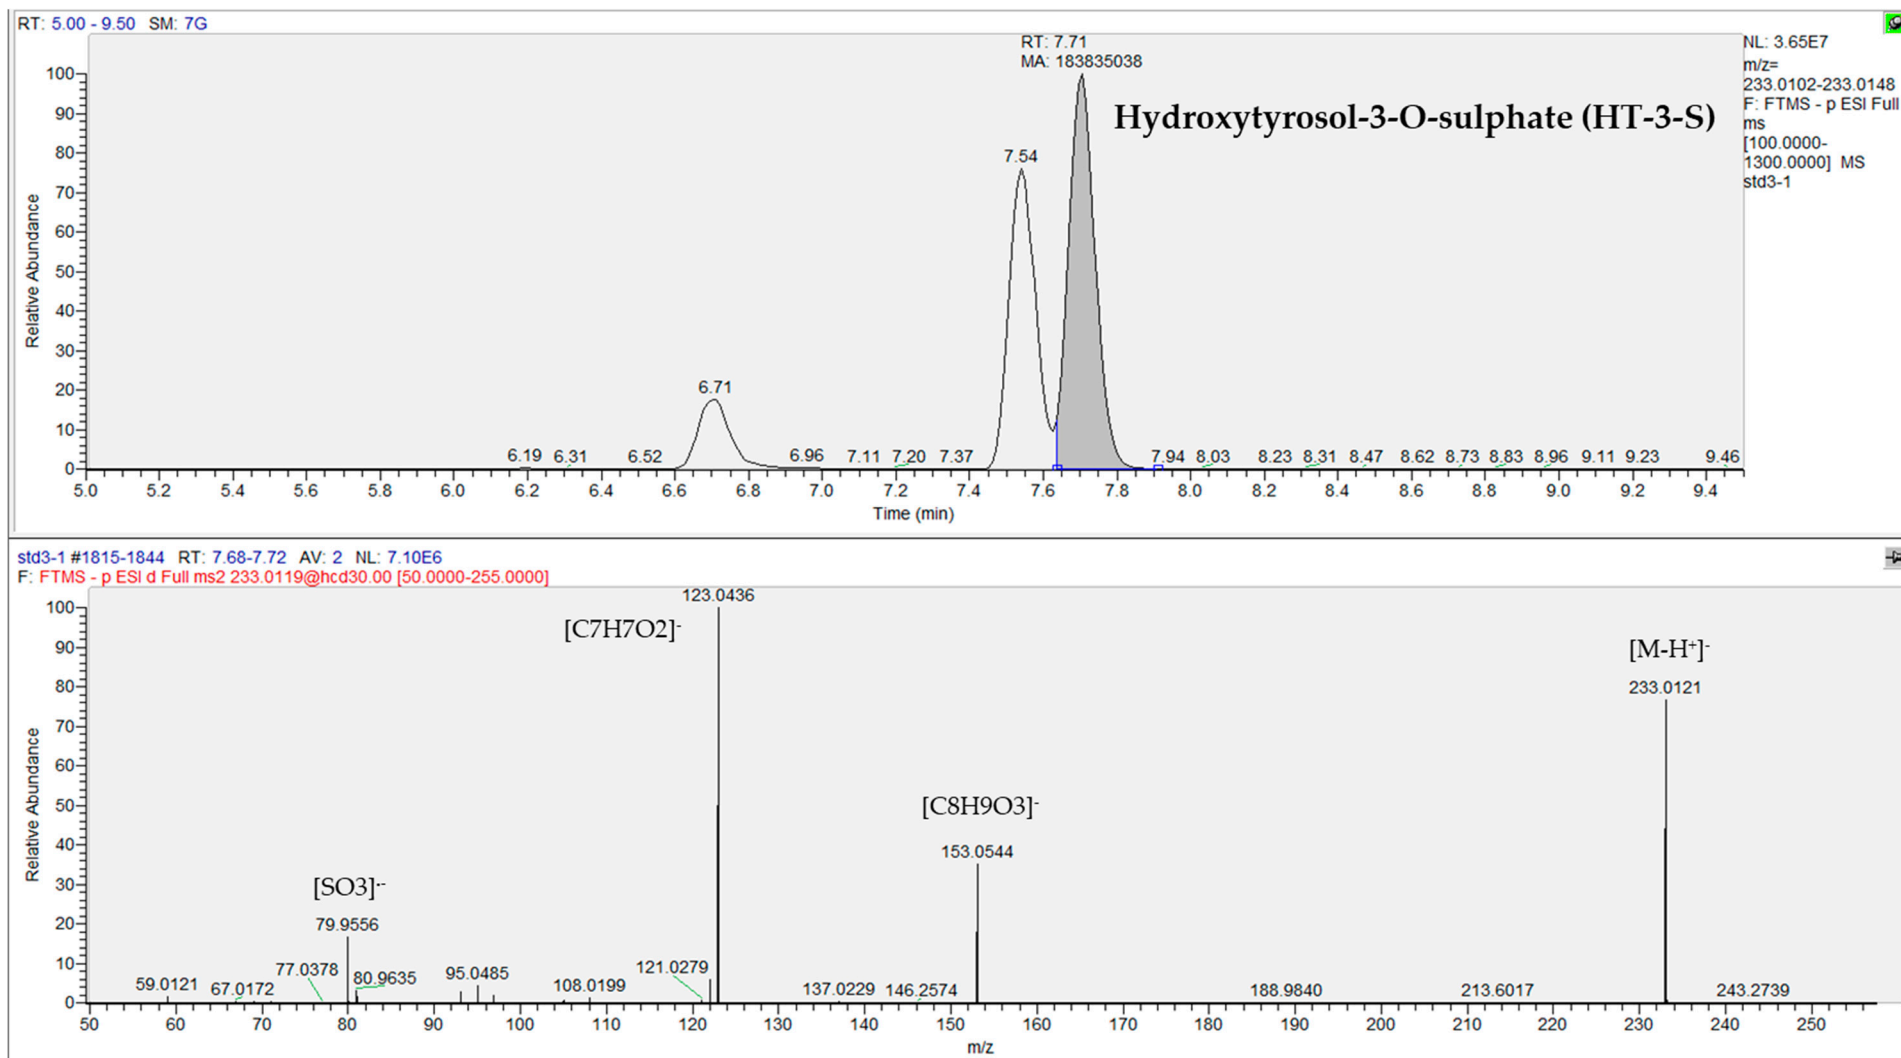

Figure S5 – LC-Q-Orbitrap chromatogram and MS<sup>2</sup> spectrum of HT-3-S

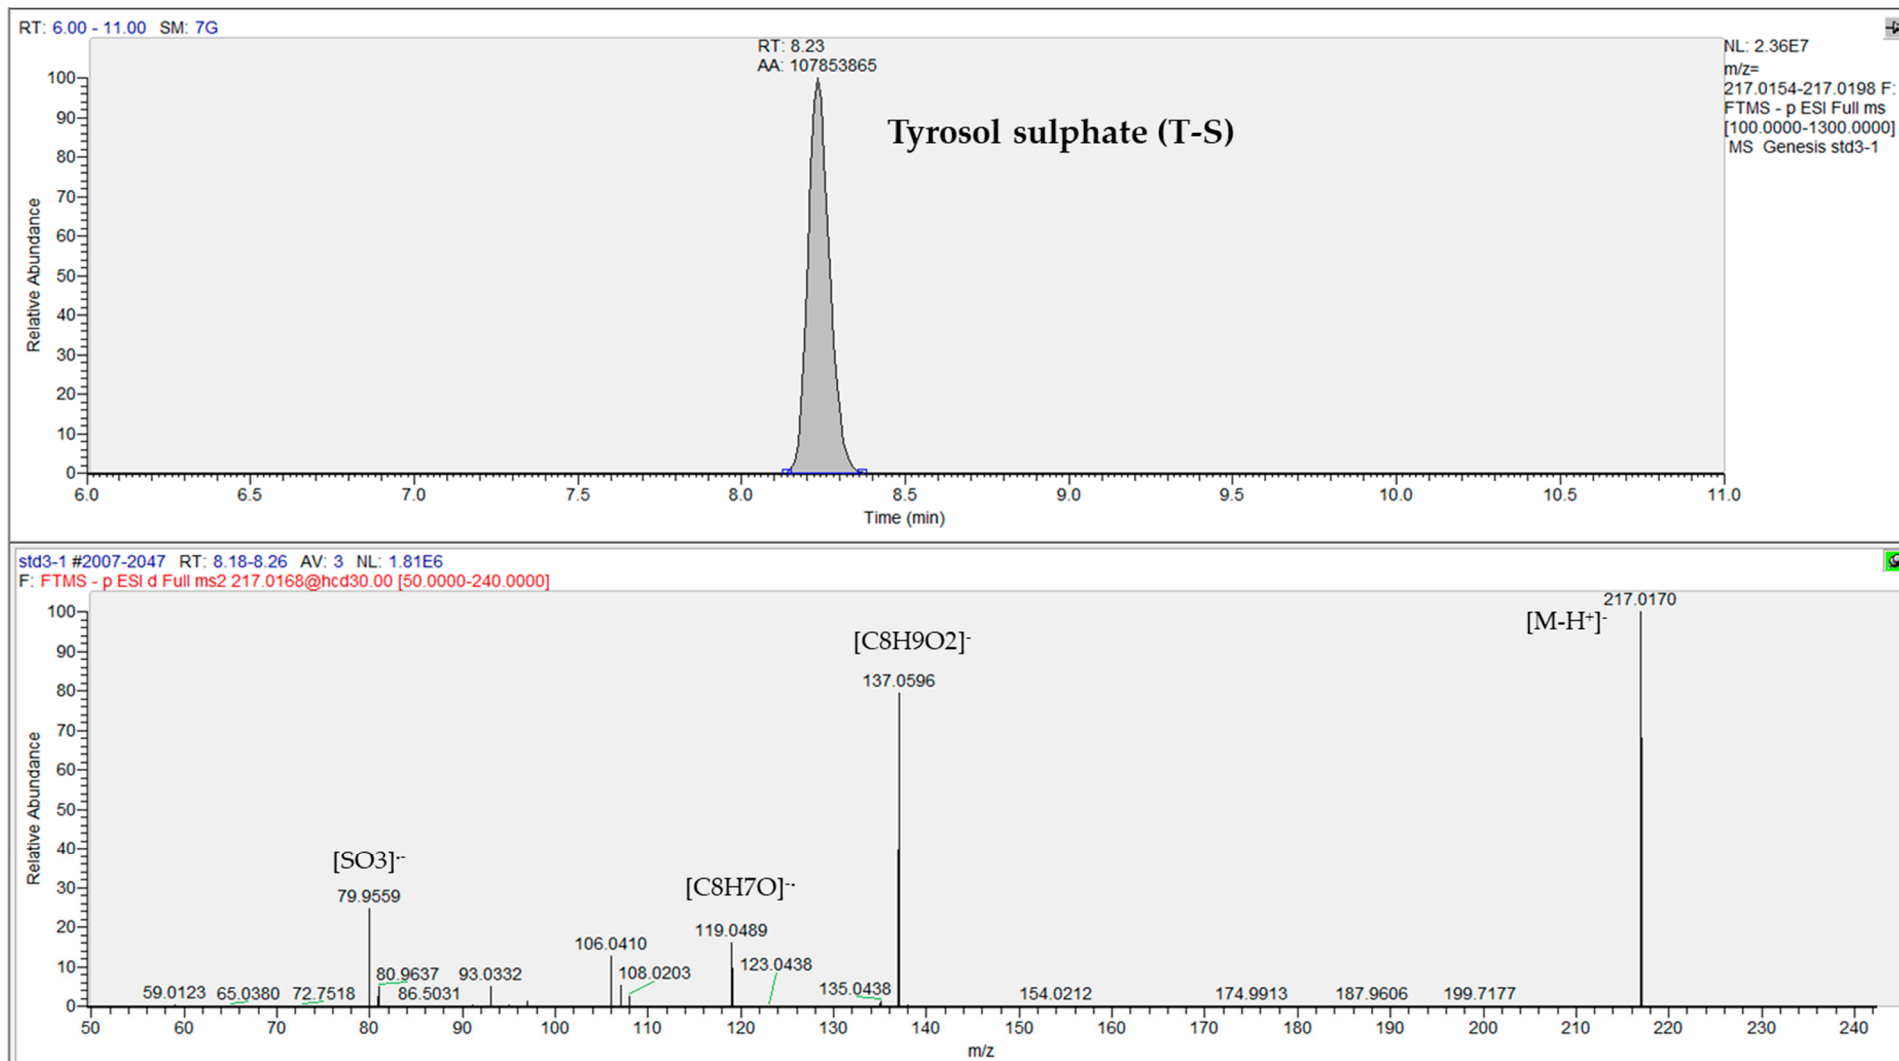

Figure S6 – LC-Q-Orbitrap chromatogram and MS<sup>2</sup> spectrum of T-S

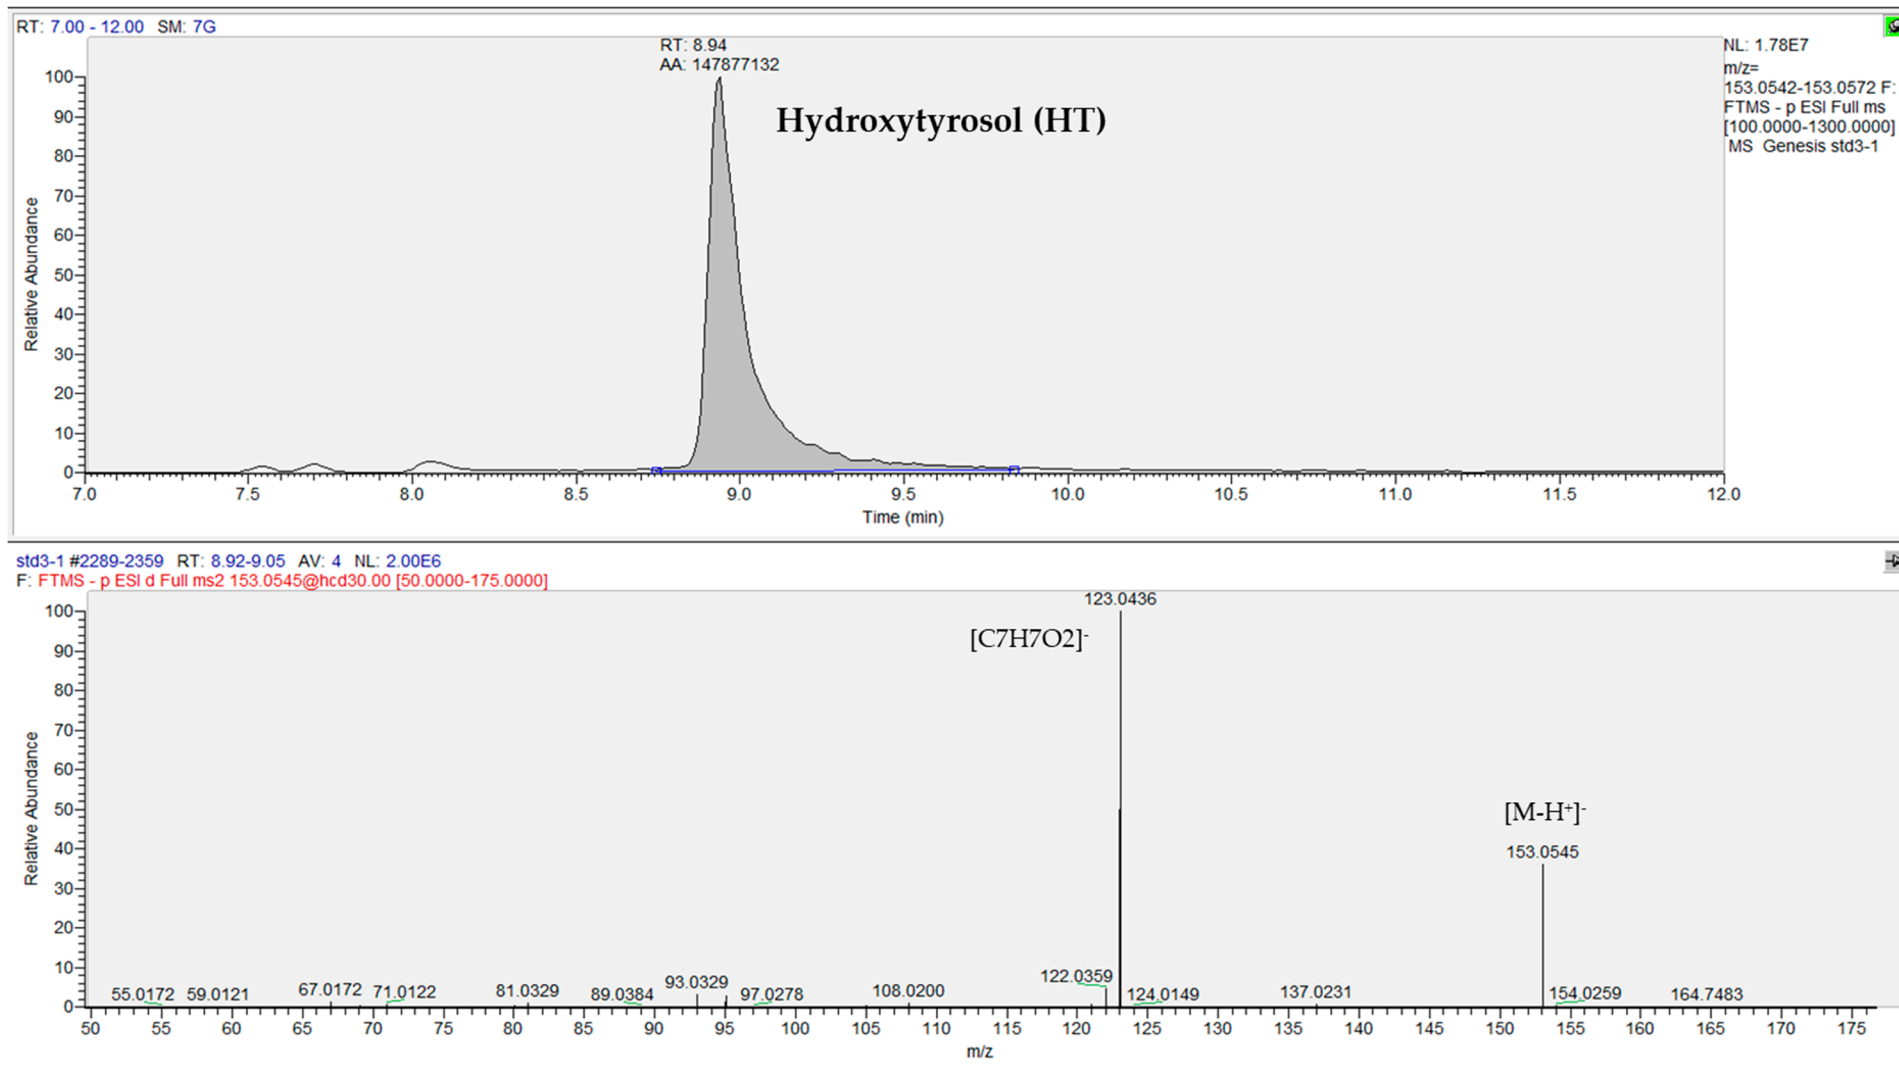

Figure S7 – LC-Q-Orbitrap chromatogram and MS<sup>2</sup> spectrum of HT

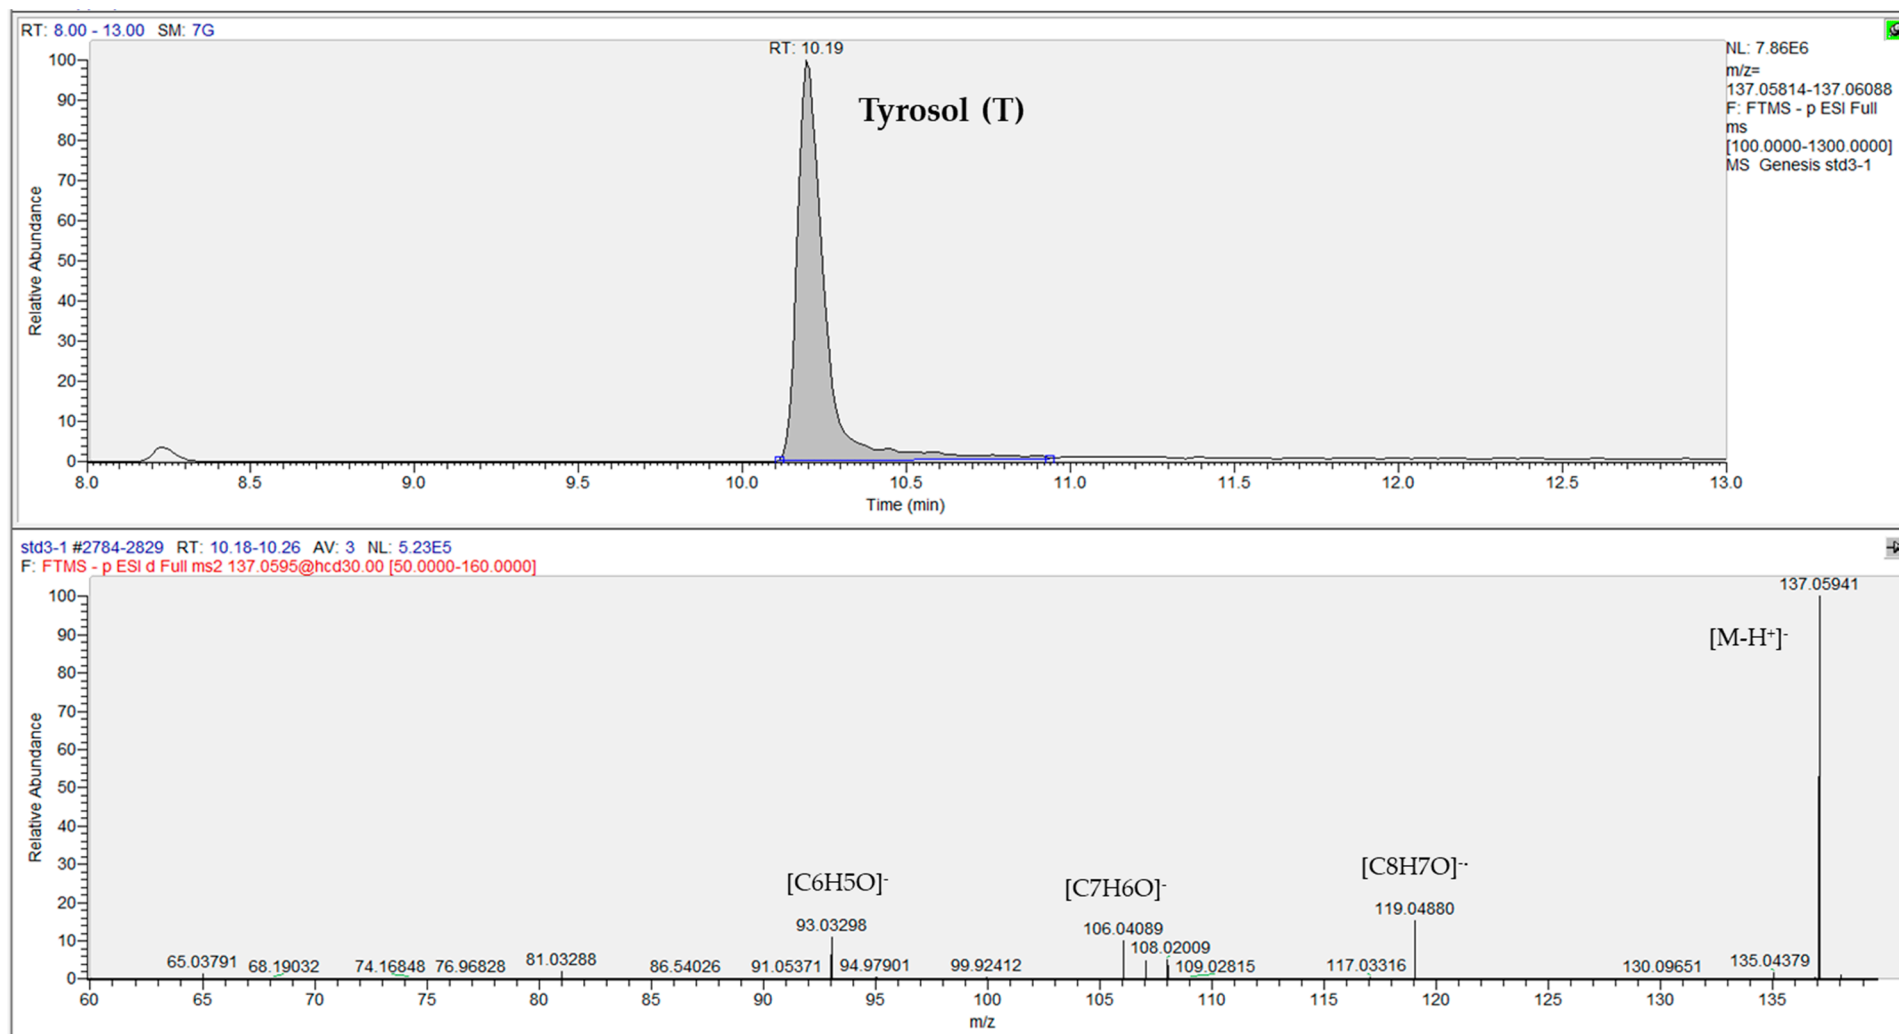

Figure S8 – LC-Q-Orbitrap chromatogram and MS<sup>2</sup> spectrum of T
